# Supplementary material for: Sargassum fusiforme together with turmeric extract and pomegranate peel extract alleviates obesity in high fat-fed C57BL/6J mice
Source: Royal Society of Chemistry journal article supplement (doi:10.1039/d0fo03044a), 2021-01-01
Supplement: d0fo03044a1.pdf [file d0fo03044a1.pdf]

## Supplementary Information

***Sargassum fusiforme* together with turmeric extract and pomegranate peel extract alleviates obesity in high fat-fed C57BL/6J mice**

### Authors

Sainan Zhou, Qing Zhang, Yuan Gao, Fang Liu, Wanxiu Cao, Zhaojie Li, Changhu Xue and Qingjuan Tang

**This Supplementary Information Includes:**

**Supplementary Materials and Methods**

**Supplementary Tables**

**Supplementary Figures**

## Supplementary Materials and Methods

### Preparation of water extract of *Sargassum fusiforme*

Dried *Sargassum fusiforme* were soaked in water at room temperature for 10 h, and then milled into powder. Milled seaweed powder and distilled water were evenly mixed at the ratio of material to solution of 1 : 50, and stirred in a water bath at 85 °C for 6 h. The extract was centrifuged at 4500 rpm for 15 min at room temperature, and then the supernatant was collected and concentrated by rotary evaporation at 45 °C. The supernatant was transferred to an air-drying cabinet for drying at 35 °C when the condensation tube was free of water droplets. The dry powder obtained was water extract of *Sargassum fusiforme*. The extraction rate was calculated according to the following formula.

$$\text{Extraction rate}(\%) = \frac{x}{S} \times 100\%$$

Where x is the mass of dried water extract of *Sargassum fusiforme*, S is the mass of dried *Sargassum fusiforme*.

## Supplementary Tables

### Supplementary Table S1

**Table S1** Formulation information

| Formulation                                 | Ingredient                                  | Content                        | Compound proportion |
|---------------------------------------------|---------------------------------------------|--------------------------------|---------------------|
| Water extract of <i>Sargassum fusiforme</i> | water extract of <i>Sargassum fusiforme</i> | 100 %                          |                     |
| together with curcumin                      | curcumin                                    | 95 %                           | 150 : 6 : 3         |
| and punicalagin                             | punicalagin                                 | 98 %                           |                     |
| <i>Sargassum fusiforme</i>                  |                                             | 15 % water extract of          |                     |
| together with turmeric                      | <i>Sargassum fusiforme</i>                  | <i>Sargassum fusiforme</i> (by |                     |
| extract and pomegranate                     |                                             | calculating the extraction     | 1000 : 28 : 15      |
| peel extract (C)                            | turmeric extract                            | 20 % curcumin                  |                     |
|                                             | pomegranate peel extract                    | 20 % punicalagin               |                     |

## Supplementary Table S2

**Table S2** Formula and caloric information for D14060603 (LFD)

| Ingredient                            | Grams |
|---------------------------------------|-------|
| Casein                                | 200   |
| L-Cystine                             | 3     |
| Corn Starch                           | 452.2 |
| Maltodextrin 10                       | 75    |
| Sucrose                               | 172.8 |
| Cellulose, BW200                      | 50    |
| Corn Oil                              | 25    |
| Lard                                  | 20    |
| Mineral Mix S10026                    | 10    |
| DiCalcium Phosphate                   | 13    |
| Calcium Carbonate                     | 5.5   |
| Potassium Citrate, 1 H <sub>2</sub> O | 16.5  |
| Vitamin Mix V10001                    | 10    |
| Choline Bitartrate                    | 2     |
| Total                                 | 1055  |

  

| Caloric Information |            |
|---------------------|------------|
| Protein             | 20% kcal   |
| Fat                 | 10% kcal   |
| Carbohydrate        | 70% kcal   |
| Energy Density      | 3.8 kcal/g |

### Supplementary Table S3

**Table S3** Formula and caloric information for D14060606 (HFD)

| Ingredient                            | Grams |
|---------------------------------------|-------|
| Casein                                | 200   |
| L-Cystine                             | 3     |
| Corn Starch                           | 72.8  |
| Maltodextrin 10                       | 100   |
| Sucrose                               | 172.8 |
| Cellulose, BW200                      | 50    |
| Corn Oil                              | 25    |
| Lard                                  | 177.5 |
| Mineral Mix S10026                    | 10    |
| DiCalcium Phosphate                   | 13    |
| Calcium Carbonate                     | 5.5   |
| Potassium Citrate, 1 H <sub>2</sub> O | 16.5  |
| Vitamin Mix V10001                    | 10    |
| Choline Bitartrate                    | 2     |
| Total                                 | 858.1 |

  

| Caloric Information |            |
|---------------------|------------|
| Protein             | 20% kcal   |
| Fat                 | 45% kcal   |
| Carbohydrate        | 35% kcal   |
| Energy Density      | 4.7 kcal/g |

## Supplementary Figures

### Supplementary Figure S1

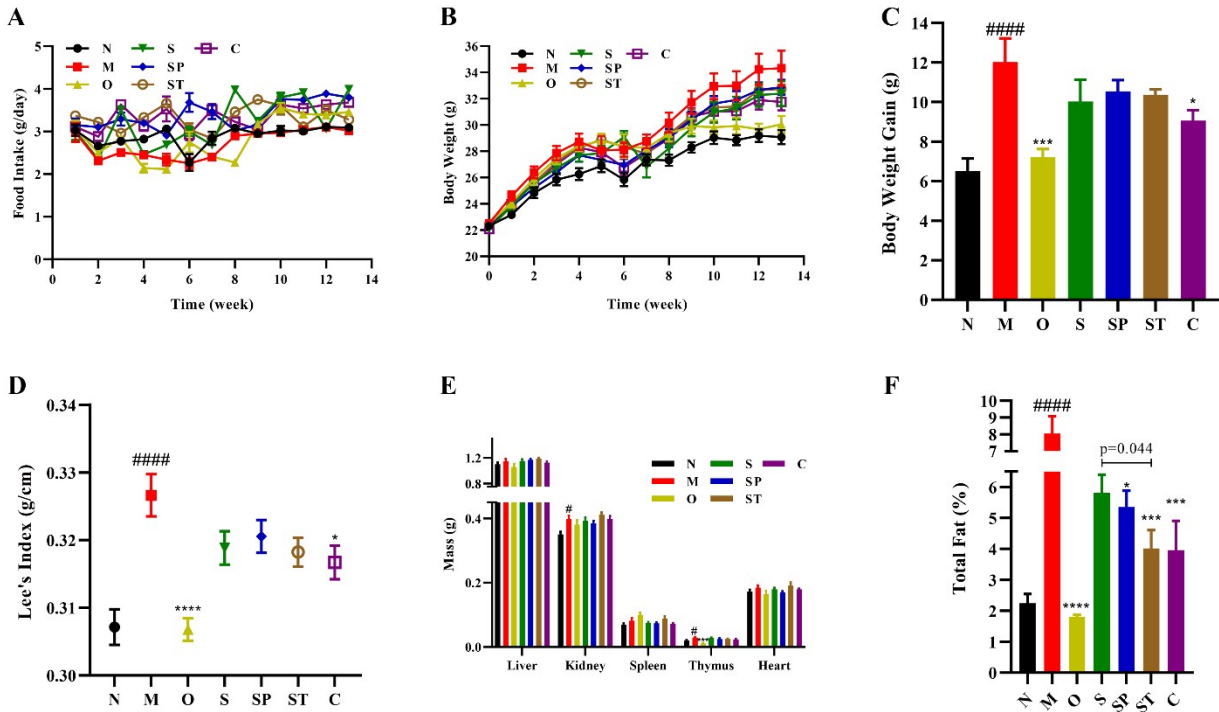

**Fig. S1** The effects of diet on phenotype of overweight C57BL/6J mice. (A) Food intake throughout the experiment, (B) body weight fluctuations, (C) weight gain, (D) Lee's index, (E) weight of organs, (F) total fat percentage. N = Normal, M = Model, O = Orlistat, S = *Sargassum fusiforme*, SP = *Sargassum fusiforme* together with pomegranate peel extract, ST = *Sargassum fusiforme* together with turmeric extract, C = *Sargassum fusiforme* together with turmeric extract and pomegranate peel extract. Values are given as mean  $\pm$  SEM, n = 10. Statistical significances were calculated using one-way ANOVA (# and \*  $p < 0.05$ , \*\*\*  $p < 0.001$ , #### and \*\*\*\*  $p < 0.0001$ ), # denotes versus N, \* denotes versus M. The statistical analysis between C (or SP, ST) and S was assessed by t test.

## Supplementary Figure S2

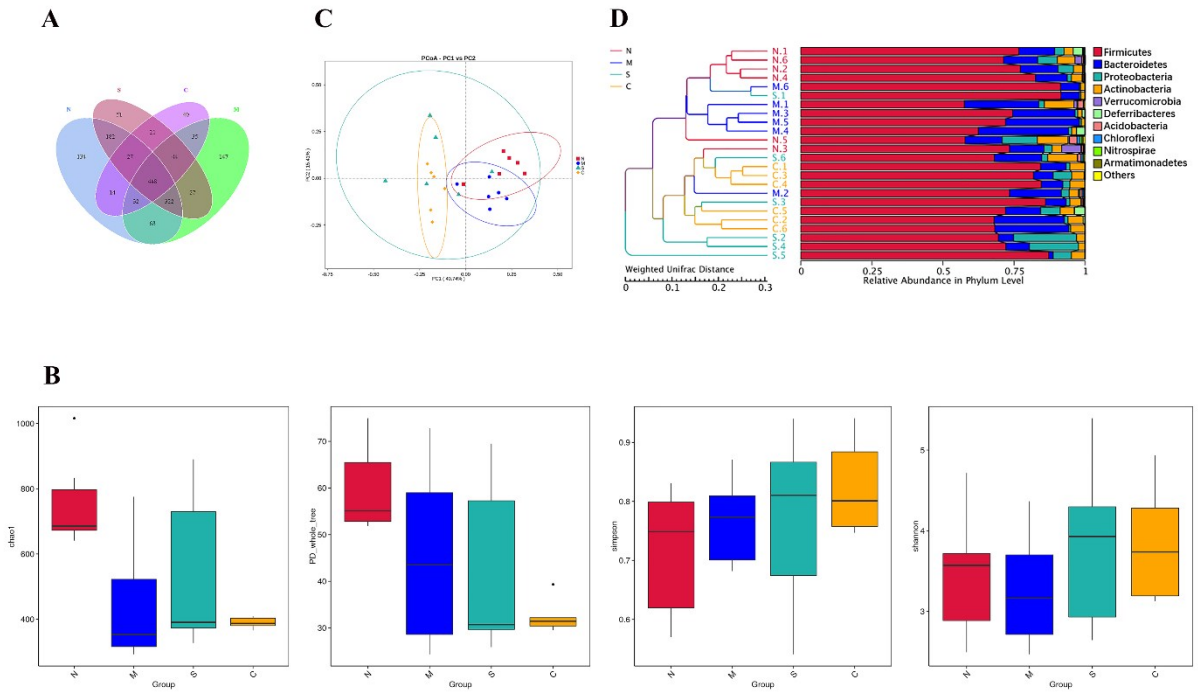

**Fig. S2** (A) Venn diagram of microbiota differences, (B)  $\alpha$  diversity indices (from left: Chao1, PD whole tree, Simpson, and Shannon), (C) PCoA based on Weighted UniFrac, (D) UPGMA cluster tree based on Weighted UniFrac. N = Normal, M = Model, S = *Sargassum fusiforme*, C = *Sargassum fusiforme* together with turmeric extract and pomegranate peel extract; n = 6.

### Supplementary Figure S3

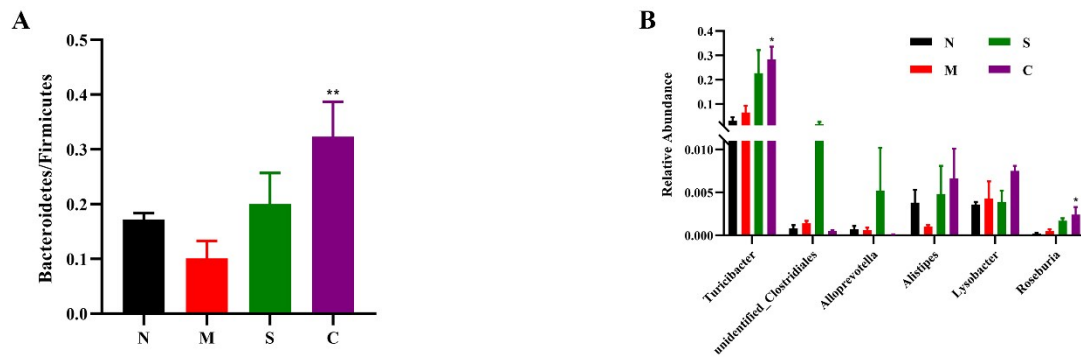

**Fig. S3** (A) The ratio of Bacteroidetes to Firmicutes, (B) the relative abundance of selected bacteria at genus level. N = Normal, M = Model, S = *Sargassum fusiforme*, C = *Sargassum fusiforme* together with turmeric extract and pomegranate peel extract. Values are given as mean ± SEM, n = 6. Statistical significances were calculated using one-way ANOVA (\*  $p < 0.05$ , \*\*  $p < 0.01$ ), \* denotes versus M.
